# Supplementary material for: Paclitaxel synthetic studies. A Diels–Alder approach to the A-ring
Source: Royal Society of Chemistry journal article supplement (doi:10.1039/b005533f), 2000-01-01
Supplement: b005533f.doc [file b005533f.doc]

Preparation of (13).

A degassed solution of the diene **12** (3.26 g, 7.14 mmol) and citraconic anhydride (1.28 ml, 14.28 mmol), in toluene (2.16 ml, 3.3 M), was heated in a sealed tube at 150C for 24 h. Dilution of the reaction mixture with CH2Cl2, transfer to a round bottom flask and concentration before chromatography (83 % petrol-ethylacetate) gave *the (3aR,4S, 7aR)-4-Benzyloxy-6-(tert-butyl-diphenyl-silanyloxymethyl)-3a,7,7-trimethyl-3a,4,7,7a,tetrahydro-isobenzofuran-1,3-*dione as a pale yellow oil (2.69 g, 66%); R*f* 0.19 (83 % petrol-ethyl acetate); vmax (film) 3069, 3049, 2959, 2890, 2857, 1843, 1778, 1471, 1456, 1427, 1390, 1383, 1253, 1228, 1189, 1112, 1025, 989, 973, 824 cm-1; H (270 MHz) 7.71-7.67 (4H, m, *ortho*-PhSi), 7.48-7.23 (11H, m, *meta*-, *para*-PhSi and C6H5CH2), 6.25 (1H, d with additional fine structure, J 6.0 Hz, H-5), 4.57 and 4.43 (2H, 2d, J 12.0 Hz, CH2Ph), 4.31 (2H, m, OCH2), 4.02 (1H, d, J 6.0 Hz, H-4), 2.60 (1H, s, H-7a), 1.36 (3H, s, CH3), 1.34 (3H, s, CH3), 1.21 (3H, s, CH3), 1.11 (9H, s, SiC(CH3)3); C (125 MHz) 174.2 (CO), 170.4 (CO), 150.7 (C-4), 137.3, 135.4, 134.8, 133.3, 133.1, 130.0, 129.9, 128.4, 127.8, 127.7, 127.5 (Ar-C), 118.5 (C-3), 73.5 (CH2-Ph), 70.5 (C-2), 69.2 (CH2-Ph), 56.6 (CH2-OSi), 51.3 (C-1), 35.5 (C-5), 29.0 (Me), 26.9 (SiC(CH3)3), 26.3 (Me), 24.3 (Me), 19.3 (SiC(CH3)3); *m/z* (CI) 586 [M+NH4]+, 569 [M+H]+, 480, 332, 301, 274, 196 (Found: [M+H]+, 586.2993. C25H40O5Si requires [M+NH4]+, 586.2989); (Found: C, 73.69; H, 6.81. C35H40O5Si requires C, 73.91; H, 7.91 %)

# Preparation of (16).

To a stirred solution of anhydride **13** (2.69 g, 4.74 mmol) in THF (9.5 ml, 0.5 M) at rt was added pyrrolidine (1.98 ml, 23.7 mmol, 5.0 equiv) and the reaction stirred for 1 h under N2, before saturated NH4Cl (20 ml) was added and the aqueous layer extracted with DCM (4 x 15 ml). The combined organic layers were washed with brine (15 ml) and dried (Na2SO4). Concentration under reduced pressure gave an impure pale yellow solid, which was purified by washing with and filtering with cold Et2O to give as a white solid 2-Benzyloxy-4-(tert-butyl-diphenyl-silanyloxymethyl)-1,5,5-trimethyl-6-(1-pyrrolidin-1-yl-methanoyl)-cyclohex-3-enecarboxylic acid (2.62 g, 86%); vmax (film) 3133, 3087, 3046, 3010, 2857, 1740, 1577, 1481, 1455, 1390, 1340, 1319, 1244, 1187, 1112; H (300 MHz) 7.75-7.25 (15H, m, Ar-H), 6.20 (1H, s, H-3), 4.86 and 4.60 (2H, d, J 12.7 Hz, CH2Ph), 4.19 (2H, m, OCH2), 3.75 (1H, s, H-2), 3.7-3.4 (4H, m, NCH2), 2.76 (1H, s, H-6), 2.02-1.85 (4H, m, NCH2CH2), 1.29 (3H, s, Me), 1.13 (3H, s, Me), 1.05 (9H, s, SiC(CH3)3); C (75 MHz) 172.1 (CO), 171.7 (CO), 142.4-127.7 (18C, Aromatics and C-4), 124.1 (C-3), 82.3 (C-2), 72.4 (PhCH2), 62.7 (OCH2), 57.4 (C-6), 48.9 and 46.9 (NCH2), 39.4 (C-5), 29.5 (C-1), 29.5 (Me), 26.9 (SiC(CH3)3), 26.2 and 24.3 (NCH2CH2), 23.1 (Me), 21.8 (Me), (SiC(CH3)3); m/z (CI) 640[M+H]+, 587, 586, 569, 511, 483, 461, 428, 394, 370, 306, 255, 232, 216, 196, 167, 155, 133, 124, 108, 91 (Found: [M+H]+, 640.3471. C25H40O5Si requires [M+H]+, 640.3458).

To a stirred solution of material (1.56 g, 2.44 mmol) prepared as described above in DCM (12.2 ml, 0.2 M) at rt was added NEt3 (0.85 ml, 6.10 mmol, 2.5 equiv) followed by i-BuOCOCl (0.36 ml, 2.68 mmol, 1.1 equiv) and the reaction was stirred for 2 h. Thereafter, H2O (20 ml) was added, and the aqueous layer extracted with DCM (4 x 15 ml) and the combined organic layers were washed with brine (20 ml) and dried (Na2SO4). Concentration under reduced pressure gave 7-Benzyloxy-5-(tert-butyl-diphenyl-silanyloxymethyl)-4,4,7a-trimethyl-3-pyrrolidin-1-yl-7,7a-dihydro-4H-isobenzofuran-1-one (1.52 g, 100%) as a pale brown oil which needed no further purification; Rf 0.84 (50 % petrol-ethylacetate, on a basic alumina plate); vmax (film) 3079, 3068, 2933, 2859, 1789, 1704, 1647, 1587, 1490, 1457, 1427, 1388, 1351, 1295, 1222, 1184, 1112, 1083; H (270 MHz) 7.75-7.20 (15H, m, Ar-H), 6.16 (1H, d, J 5.9 Hz, H-6), 4.59 and 4.28 (2H, d, J 12.2 Hz, PhCH2), 3.99 (1H, d, J 5.9 Hz, H-7), 3.2-2.95 (4H, m, NCH2), 1.8-1.72 (4H, m, NCH2CH2), 1.33 (3H, s, Me), 1.22 (3H,s, Me), 1.06 (3H, s, Me), 1.05 (9H, s, SiC(CH3)3); C (75 MHz) 179.6 (CO), 149.5 (CO), 148.9-127.6 (18C, Aromatics and C-4), 117.8 (C-3), 116.5 (C-6), 74.7 (C-2), 70.6 (PhCH2), 62.5 (OCH2), 52.9 (C-1), 51.2 (NCH2), 36.4 (C-5), 27.3 (SiC(CH3)3), 26.9 (Me), 26.7 (Me), 26.0 (NCH2CH2), 22.4 (Me), 19.7 (Me), 19.1 (SiC(CH3)3); ); m/z (CI) 622[M+H]+, 516, 515, 514, 274, 260, 216, 199, 196, 180, 178, 166, 161, 135, 108, 105, 98, 91 (Found: [M+H]+, 622.3367 C39H48O4NSi requires [M+H]+, 622.3353).

**Preparation of (17).**

# To a stirred solution of ketaminal 16 (197 mg, 0.317 mmol) in THF (3 ml, 0.1 M) at 0C was added NEt3 (100 l, 0.63 mmol, 2.0 equiv) and H2O (30 l, 1.59 mmol, 5.0 equiv). After 10 min NCS (45 mg, 0.32 mmol, 1.0 equiv) was added and the reaction stirred for 1 h , before saturated NaHCO3 (3 ml) was added and the mixture extracted with Et2O (4 x 5 ml). The combined organic layers were washed with brine (10 ml) and dried (Na2SO4). Concentration under reduced pressure andchromatography (10% Et2O-petrol) gave *(3aS,7S,7aR)-7-Benzyloxy-5-(tert-butyl-diphenyl-silanyloxymethyl)-3a-chloro-4,4,7a-trimethyl-3a, 4, 7, 7a-tetrahydro-isobenzofuran-1,3-dione*(166 mg, 87%) as a white solid; R*f* 0.46 (50 % petrol-ethylacetate); vmax (soltn-CDCl3) 2385, 2281, 1788, 1266, 754, 723; H (270 MHz) 7.69-7.32 (15H, m, H-Ar), 6.00 (1H, m, H-6), 4.71 (2H, s, PhCH2), 4.26 (2H, s, SiOCH2), 4.11 (1H, m, H-7), 1.70 (3H, s, Me), 1.51 (3H, s, Me), 1.10 (9H, s, SiC(CH3)3), 1.02 (3H, s, Me); C (300 MHz) 169.5 (C=O), 167.1 (C=O), 145.9 (*ipso* SiAr), 136.8 (*ipso* SiAr), 135.5 (*ortho* SiAr), 133.0 (q, CCl), 132.8 (q, C-5), 130.0, 128.6, 128.0, 127.9, 127.8, (ArCH and SiArCH), 121.5 (CH, C-6), 77.7 (CH, C-7), 73.0 (PhCH2), 63.5 (SiOCH2), 58.2 (q, CMe), 40.8 (q, SiC(Me)3), 26.8 (SiC(CH3)3), 24.1 (CH3), 20.7 (CH3), 20.1 (CH3), 19.3 (q, C-4); *m/z* (CI) 623 [M+NH4]+, 623, 620, 603, 586, 569, 480, 461, 422, 373, 306, 274, 243, 216, 196, 108, 91, 78 (Found: [M+NH4]+, 623.2623. C35H40O5SiCl requires [M+NH4]+, 623.2649). (Found: C, 69.49; H, 6.48. C35H39O5SiCl requires C, 69.69; H,6.52 %).

# Preparation of (19).

# To a flask containing -chloroanhydride 17 (54 mg, 0.09 mmol, 1 equiv) under N2, was added with vigorous stirring DMSO (0.25 ml) and DMPU (0.38 ml). Pyrrolidine (0.38 ml, 4.4 mmol, 50.0 equiv) was then added upon solvation of the -chloroanhydride. After 2 h stirring at rt, dilution with Et2O (15 ml), washing with H2O (4 x 3 ml) and drying (Na2SO4) of organic phase gave *1-[(S)-3-Benzyloxy-5-(tert-butyl-diphenyl-silanyloxymethyl)-2,6,6-trimethyl-cyclohexa-1,4-dienyl]-1-pyrrolidin-1-yl-methanone* (53 mg, 100%) as a colourless oil which required no further purification, upon concentration under reduced pressure. R*f* 0.16 (33% ethyl acetate-petrol); vmax (soltn-CDCl3) 2964, 2931, 2882, 2864, 2250, 1602, 1460, 1434, 905, 724, 650 cm-1; H (270 MHz) 7.72-7.44 (4H, m, *ortho* (Ph)2Si), 7.42-6.96 (11H, m, Ar-H), 6.18-6.17 (1H, m, H-4)

Rotamer a; 4.63 (1H, d, J 3.7 Hz, H-3), 4.52 (1H, d, J 11.4 Hz, PhCH2), 4.38 (1H, d, J 11.4 Hz, PhCH2), 4.32 (2H, m, SiOCH2), 1.77 (3H, s, Me), 1.24 (3H, s, Me), 1.02 (3H, s, Me)

Rotamer b; 4.46 (1H, m, H-3), 4.36 (1H, d, J 10.8 Hz, PhCH2), 4.30 (1H, m, SiOCH2), 4.25 (1H, d, J 10.9 Hz, PhCH2), 1.79 (3H, s, Me), 1.32 (3H, s, Me), 1.02 (3H, s, Me)

3.5 (4H, m, NCH2), 2.02-1.79 (4H, m, NCH2CH2), 1.08 (9H, s, (CH3)3Si); C (270 MHz) 170.6 (CO),169.2 (CO), 168.8 (CO), 148.0 (q), 146.0 (q), 145.4 (q), 142.6 (q), 140.6 (q), 139.0 (q), 138.7 (q), 135.5 (Ar-H), 133.4 (q), 133.3 (q), 129.8 (Ar-H), 129.4 (q), 128.5 (q), 128.4 (q), 128.1 (q), 128.0 (q), 118.6 (CH), 117.8 (CH), 117.6 (CH), 72.7 (CH), 68.3 (CH2), 67.9 (CH2), 66.1 (CH2), 62.5 (CH2), 62.4 (CH2), 47.8 (CH2), 47.6 (CH2), 45.0 (CH2), 37.8 (q), 37.1 (q), 29.3 (CH3), 29.0 (CH3), 26.9 (CH3), 26.1 (CH2), 24.5 (CH2), 19.3 (q), 17.1 (CH3), 16.9 (CH3); *m/z* (CI) 611 [M+NH4]+, 594 [M+H]+, 487, 470, 406, 389, 274, 248, 218, 196, 150, 133, 126, 108, 72, 52 (Found: [M+NH4]+, 594.3403. C33H47NO3Si requires [M+H]+, 594.3405)

**Preparation of (20).**

# To a stirred solution of the alcohol (from deprotected 19) (42 mg, 0.12 mmol, 1.0 equiv) in DCM (0.6 ml, 0.2 M) at 0C was added NEt3 (28 l, 0.18 mmol, 1.5 equiv) and DMAP (3 mg, 0.02 mmol, 0.2 equiv) followed by 2,4-dinitrobenzoylchloride (31 mg, 0.13 mmol, 1.1 equiv). After stirring for 3 h, saturated NaHCO3 (3 ml) was added, and the mixture extracted with DCM (4 x 5 ml). The combined organic layers were washed with brine (5 ml) and dried (Na2SO4). Concentration under reduced pressure and chromatography (50% petrol-ethylacetate) gave SM (6 mg, 14%), and *3,5-Dinitro-benzoate(S)-3-benzyloxy-4,6,6-trimethyl-5-(1-pyrrolidin-1-yl-methanoyl)-cyclohexa-1,4-dienylmethyl ester*(41 mg, 63%) as a colourless oil; R*f* 0.12 (50% petrol-ethylacetate); vmax (soltn-CDCl3) 3153, 2979, 2929, 2900, 2252, 1793, 1733, 1602, 1548, 1467; H (270 MHz) 9.23-9.07 (3H, m, H-Ar), 7.45-7.18 (5H, m, H-Ar), 3.63-3.25 (4H, m, NCH2), 1.94-1.83 (4H, m, NCH2CH2)

Rotamer a; 6.00 (1H, d, J 2.7 Hz, H-2), 5.03 (2H, s, SiOCH2), 4.50 (1H, d, J 11.4 Hz, PhCH2), 4.44 (1H, d, J 11.4 Hz, PhCH2), 4.45 (1H, masked d, H-3), 1.8 (3H, s, Me), 1.44 (3H, s, Me), 1.27 (3H, s, Me)

Rotamer b; 5.96 (1H, d, J 4.0 Hz, SiOCH2), 5.07 (2H, masked m, SiOCH2), 4.60 (1H, d, J 3.5 Hz, H-3), 4.33 (1H, d, J 11.4 Hz, PhCH2), 4.29 (1H, d, J 11.4 Hz, PhCH2), 1.78 (3H, s, Me), 1.56 (3H, s, Me), 1.24 (3H, s, Me);

C (270 MHz) 168.5 (CO), 162.1 (CO), 148.7 (q), 140.4 (q), 139.9 (q), 138.1 (q), 133.6 (q), 129.6 (*ortho* PhCO2), 129.1 (q), 128.3 (*ortho* Ph), 127.9 (*meta* Ph), 124.8 (*para* PhCO2), 122.7 (*para* Ph), 72.4 (CH-3), 69.3 (PhCH2), 65.9 (SiOCH2), 47.9 (NCH2), 45.1 (NCH2), 38.1 (q-6), 29.0 (CH3), 26.1 (NCH2CH2), 24.5 (NCH2CH2), 24.5 (CH3), 17.0 (CH3) *m/z* (CI) 550 [M+H]+, 520, 466, 442, 338, 248, 232, 218, 157, 150, 133, 98 (Found: [M+H]+, 550.2189. C29H31N3O8 requires [M+H]+, 550.2191).

**Preparation of (4).**

# a flask containing -chloroanhydride 17 (78 mg, 0.13 mmol, 1 equiv) under N2, was added with vigorous stirring MeCN (0.37 ml) and DMPU (0.55 ml). BnMe3OMe (2.93 g of a 40 wt % solution in MeOH, 4.4 mmol, 50.0 equiv) was then added upon solvation of the -chloroanhydride. After 27 h stirring at rt, dilution with Et2O (15 ml), washing with H2O (4 x 3 ml) and drying (Na2SO4) of organic phase gave a colourless oil upon concentration under reduced pressure. Chromatography (33 % ethylacetate-petrol) gave *(S)-3-Benzyloxy-5-hydroxymethyl-2,6,6-trimethyl-cyclohexa-1,4-dienecarboxylic acid methyl ester*

(30 mg, 73 %); R*f* 0.49 (50 % ethylacetate-petrol); vmax (soltn-CDCl3) 3156, 2985, 2951, 2934, 2901, 2876, 2382, 2253, 1809, 1721, 1467, 1433, 1381; H (270 MHz) 7.33-7.18 (5H, m, H-Ar), 5.93-5.90 (1H, dt, J 3.0 Hz, 1.2 Hz, H-4), 4.53 (1H, d, J 2.7 Hz, H-3), 4.39 (1H, d, J 11.4 Hz, PhCH2), 4.32 (1H, d, J 11.4 Hz, PhCH2), 4.28-4.17 (2H, dd, CH2OH), 3.78 (3H, s, OMe), 1.79 (1H, d, J 0.5 Hz, Me), 1.26 (3H, s, Me), 1.21 (3H, s, Me); C (270 MHz) 170.2 (CO), 147.0 (q), 139.8 (q), 138.7 (q), 128.4 (q), 128.4 (*meta* Ar-H), 127.9 (*ortho* Ar-H), 127.6 (*para* Ar-H), 119.1 (CH-4), 72.4 (CH-3), 67.3 (PhCH2), 61.8 (OCH2), 51.6 (OMe), 37.2 (q), 27.0 Me), 26.9 (Me), 17.5 (Me); ); *m/z* (CI) 332 [M+NH4]+, 317, 315, 276, 260, 258, 244, 242, 228, 196, 164, 147, 129, 126, 108, 91, 52 (Found: [M+NH4]+, 332.1861. C19H24O4 requires [M+NH4]+, 332.1863).

**Preparation of (21)**.

# To a stirred solution of alcohol 4 (26 mg, 0.082 mmol, 1.0 equiv) in DCM (0.41 ml, 0.2 M) at 0C was added NEt3 (20 l, 0.12 mmol, 1.5 equiv) and DMAP (2.0 mg, 0.02 mmol, 0.2 equiv) followed by 2,4-dinitrobenzoylchloride (22 mg, 0.09 mmol, 1.1 equiv). Following overnight stirring, saturated NaHCO3 (3 ml) was added, and the mixture extracted with DCM (4 x 5 ml). The combined organic layers were washed with brine (5 ml) and dried (Na2SO4). Concentration under reduced pressure and chromatography (33 % ethylacetate-petrol) gave *3,5-Dinitro-benzoate(S)-3-benzyloxy-5-methoxycarbonyl-4,6,6-trimethylcyclohexa-1,4-dienylmethyl ester* (37 mg, 88 %) as a colourless oil; R*f* 0.21 (33 % ethylacetate-petrol); H (270 MHz) 9.23-9.07 (3H, m, H-Ar), 7.32-7.18 (5H, m, H-Ar), 5.99 (1H, d, J 3.4 Hz, H-2), 5.05 (2H, masked dd, CO2CH2), 4.55 (1H, d, J 2.7 Hz, H-3), 4.38 (1H, d, J 11.1 Hz, PhCH2), 4.33 (1H, d, J 11.4 Hz, PhCH2), 3.80 (3H, s, OMe), 1.81 (3H, d, J 0.5 Hz, Me), 1.37 (3H, s, Me), 1.31 (3H, s, Me); C (270 MHz) 169.8 (CO), 162.2 (CO), 148.7 (q-CNO2), 141.2 (q), 138.8 (q), 138.3 (q), 135.5 (CH-2), 133.6 (q), 130.8 (q), 129.4 (*ipso*-CCO), 128.4 (*ortho*-ArH), 127.8 (*meta*-ArH), 124.4 (*para*-ArCO2), 122.6 (ArH), 72.1 (CH-3), 67.7 (CH2), 65.7 (CH2), 51.7 (Me), 37.4 (q-7), 27.0 (Me), 26.3 (Me), 17.5 (Me); *m/z* (CI) 528 [M+NH4]+, 511 [M+H]+, 436, 420, 403, 376, 299, 208, 191, 147, 133, 108, 91, 52 (Found: [M+H]+, 511.1716. C26H27N2O9 requires [M+H]+, 511.1717.
